# Supplementary material
Source: ML conference proceedings conference paper supplement (https://openaccess.thecvf.com/content/CVPR2023/html/Guo_From_Images_to_CVPR_2023_paper.html)
Supplement: Supplementary file 1 [file Guo_From_Images_to_CVPR_2023_supplemental.pdf]

# Supplementary Material of “From Images to Textual Prompts: Zero-shot VQA with Frozen Large Language Models”

Anonymous CVPR submission

Paper ID 12114

## A. Appendix

### A.1. Reproducibility Statement

We acknowledge the importance of reproducibility for research work and try whatever we can to ensure the reproducibility of our work. As for the implementation of our method, details such as hyperparameters are provided in Section 4.1 in the main paper. We will publicly release all codes after the acceptance of this paper.

### A.2. Broader Impact Statement

We acknowledge that while the Img2LLM achieves comparable or superior performance to other zero-shot VQA methods, it has not reduced the inherent bias of these systems. Social-economic biases based on gender, age, race, and ethnicity exist in the datasets, LLMs, and VQA systems presented in this paper, including Img2LLM. Future work could assess the magnitude of this bias and mitigate its impact.

### A.3. Details about Question-Relevant Caption Generation

Concretely, we denote features of image patches extracted by ITE as  $f_v^i \in \mathbb{R}^{K \times D_v^i}$  and question features as  $f_q^i \in \mathbb{R}^{L \times D_q^i}$ , where  $i$  is the number of the layer of ITE,  $K$  is the number of images patches,  $L$  is the number of token in the given question,  $D_v^i$  is the dimension of patch feature in the  $i$ -th layer of ITE network and  $D_q^i$  is the dimension of textual feature in the  $i$ -th layer of ITE network. For cross-attention head in  $i$ -th layer, the cross-attention scores  $W^i$  between each image patch and each token in question can be calculated directly as

$$W^i = \text{softmax} \left( \frac{f_q^i W_Q^i W_K^{i \top} f_v^{i \top}}{\sqrt{D_q^i}} \right). \quad (1)$$

where  $W_Q^i \in \mathbb{R}^{D_q^i \times D_q^i}$  is the query head and  $W_K^i \in \mathbb{R}^{D_v^i \times D_q^i}$  is the key head in the  $i$ -th layer of ITE network. With Equation 1, we obtain a cross-attention matrix  $W^i \in$

$\mathbb{R}^{L \times K}$ , where each row is the cross-attention scores of each token in the question over all image patches. Specifically, the attention matrix  $W^i$  can be regarded as the patch importance for ITE to calculate the similarity of whole image and question, but it still contains redundancy that contributes only a minor performance loss [1], indicating that some patches are uninformative. In order to find these less relevant image patches, we following GradCAM and compute the derivative of the cross-attention score from ITE function  $\text{sim}(v, q)$ , *i.e.*,  $\partial \text{sim}(v, q) / \partial W$ , and multiplying its gradient matrix with the cross-attention scores element-wisely. The relevance of the  $k^{\text{th}}$  image patch with the question,  $r_k^i$ , can be computed as the average over  $H$  attention heads and the sum over  $L$  textual tokens:

$$r_k^i = \frac{1}{H} \sum_{l=1}^L \sum_{h=1}^H \min \left( 0, \frac{\partial \text{sim}(v, q)}{\partial W_{lk}^{ih}} \right) W_{lk}^{ih}, \quad (2)$$

where  $h$  is the index of attention heads and  $i$  is the layer index of ITE.

### A.4. Experimental Results of Supervised Learning Methods in A-OKVQA

We show the experimental comparisons between our method and supervised model on A-OKVQA dataset [6] as Table 3 shows. We can observe that our method outperform almost all supervised model with smaller size language model. This strongly support our method’s effectiveness in leveraging reasoning power of large language models.

### A.5. Template-Based Question Design

We design question templates for each part of speech type of answers as Table 2 shows.

### A.6. Sensitive Analysis

We evaluate the sensitive analysis about the QA pairs and number of captions in prompt for LLM as Table 3 shows. We can observe that the differences in QA scores on OK-VQA dataset are not higher than 1 as long as QA pairs in prompts. The results demonstrate the performance of our

Table 1. The experimental comparisons with models trained in A-OKVQA training dataset.

| Methods                                                              | A-OKVQA     |             |
|----------------------------------------------------------------------|-------------|-------------|
|                                                                      | Val         | Test        |
| <i>Models Fine-Tuned in A-OKVQA Training Set</i>                     |             |             |
| Pythia [2]                                                           | 25.2        | 21.9        |
| ViLBERT [4]                                                          | 30.6        | 25.9        |
| LXMERT [7]                                                           | 30.7        | 25.9        |
| KRISP [5]                                                            | 33.7        | 27.1        |
| GPV-2 [3]                                                            | <b>48.6</b> | <b>40.7</b> |
| <i>Zero-Shot Evaluation with Plug-in Frozen Large Language Model</i> |             |             |
| Ours <sub>6.7B</sub>                                                 | 33.3        | 32.2        |
| Ours <sub>13B</sub>                                                  | 33.3        | 33.0        |
| Ours <sub>30B</sub>                                                  | 36.9        | 36.0        |
| Ours <sub>66B</sub>                                                  | 38.7        | 38.2        |
| Ours <sub>175B</sub>                                                 | 42.9        | <b>40.7</b> |

Table 2. The question templates for answers with different part of speech.

| Part of Speech of Answer | Question Templates                              |
|--------------------------|-------------------------------------------------|
| Noun                     | What item is this in this picture?              |
|                          | What item is that in this picture?              |
| Verb                     | What action is being done in this picture?      |
|                          | Why is this item doing in this picture?         |
|                          | Which action is being taken in this picture?    |
|                          | What action is item doing in this picture?      |
|                          | What action is item performing in this picture? |
| Adjective                | How to describe one item in this picture?       |
|                          | What is item’s ADJ TYPE in this picture?        |
|                          | What is the ADJ TYPE in this picture?           |
| Num                      | How many things in this picture?                |

Table 3. The experimental results of using different number of captions and QA pairs as prompts. The experiments are run on OK-VQA with OPT 30B.

| QA Pairs | Caption |      |      |      |      |      |  |
|----------|---------|------|------|------|------|------|--|
|          | 0       | 10   | 20   | 30   | 40   | 50   |  |
| 0        | 3.3     | 19.6 | 22.7 | 23.4 | 24.0 | 24.8 |  |
| 10       | 40.9    | 41.6 | 42.1 | 42.1 | 41.9 | 42.2 |  |
| 20       | 41.2    | 41.3 | 41.3 | 41.7 | 42.2 | 42.0 |  |
| 30       | 41.0    | 41.0 | 41.7 | 41.8 | 41.6 | 41.5 |  |
| 40       | 40.3    | 40.7 | 40.6 | 40.3 | 40.3 | 41.1 |  |
| 50       | 40.6    | 40.6 | 40.7 | 40.9 | 40.6 | 41.1 |  |

method is robust with different numbers of QA pairs and captions.

Table 4. The experimental results of using different number of patches to generate question-relevant captions. The experiments are run on OK-VQA with OPT 30B.

| Patch_num | 10   | 20   | 40   | Full |
|-----------|------|------|------|------|
|           | 41.2 | 41.8 | 41.6 | 39.8 |

Table 5. The experimental results of generating different number of question-relevant captions. The experiments are run on OK-VQA with OPT 30B.

| Caption_num | PICa | 10   | 30   | 50   | 100  |
|-------------|------|------|------|------|------|
|             | 17.7 | 38.3 | 40.9 | 41.4 | 41.8 |

## A.7. Examples

216  
217  
218  
219  
220  
221  
222  
223  
224  
225  
226  
227  
228  
229  
230  
231  
232  
233  
234  
235  
236  
237  
238  
239  
240  
241  
242  
243  
244  
245  
246  
247  
248  
249  
250  
251  
252  
253  
254  
255  
256  
257  
258  
259  
260  
261  
262  
263  
264  
265  
266  
267  
268  
269

270  
271  
272  
273  
274  
275  
276  
277  
278  
279  
280  
281  
282  
283  
284  
285  
286  
287  
288  
289  
290  
291  
292  
293  
294  
295  
296  
297  
298  
299  
300  
301  
302  
303  
304  
305  
306  
307  
308  
309  
310  
311  
312  
313  
314  
315  
316  
317  
318  
319  
320  
321  
322  
323

**Question:** what kind of bird are they? **GT answer:** seagull/pelican/seagul

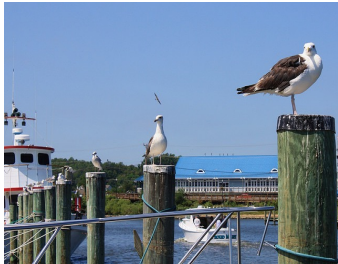

**Caption 1:** two seagulls and a seagull on a wooden platform

**Caption 2:** a group of seagulls sit on some wood

**Caption 3:** a group of seagulls sitting down in the sunshine

**Synthetic question 1:** what birds are sitting on a wooden post?

**Answer:** seagulls

**Synthetic question 2:** how many seagulls are standing on top of a wooden post?

**Answer:** two

**Question:** what kind of bird are they?

**Predicted answer:** seagull

**Question:** what kind of beverage could one make with the item on top of the stove? **GT answer:** tea

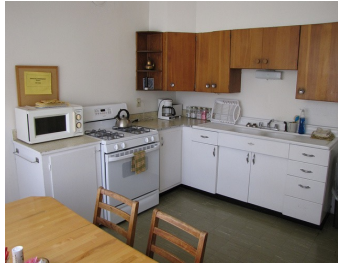

**Caption 1:** a white kitchen with a stove, sink, and tea cups

**Caption 2:** kitchen with microwave, pots, coffee maker, stove and chairs

**Caption 3:** a kitchen filled with silver stove top oven sitting next to a microwave

**Synthetic question 1:** what is in the kitchen with a tea kettle?

**Answer:** stove

**Synthetic question 2:** what is on the counter next to the stove?

**Answer:** microwave

**Question:** what kind of beverage could one make with the item on top of the stove?

**Predicted answer:** tea

(b)

**Question:** what fabric are these jackets made of? **GT answer:** denim/jean

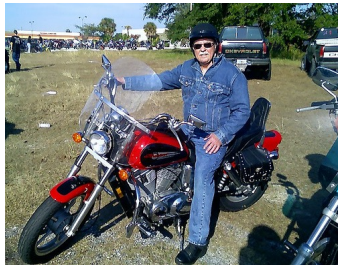

**Caption 1:** a man wearing a denims shirt stands at a motorcycle

**Caption 2:** man in denim jacket and blue uniform jacket on a red motorcycle

**Caption 3:** a man wearing blue denim clothes is standing near motorcycles

**Synthetic question 1:** what is a man wearing on a motorcycle?

**Answer:** a denim jacket

**Synthetic question 2:** what type of vehicle is the man sitting on?

**Answer:** motorcycle

**Question:** what fabric are these jackets made of?

**Predicted answer:** denim

(c)

**Question:** what style of fence is this? **GT answer:** picket/pickett

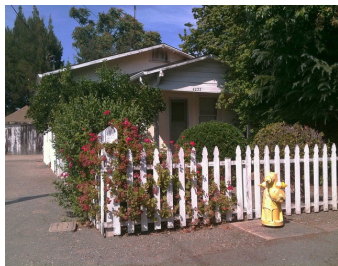

**Caption 1:** a fence of picket white boards with a gate

**Caption 2:** the house is fenced in in front of a white picketed fence

**Caption 3:** a white picket with pink roses in front of it

**Synthetic question 1:** what color is the picket fence in front of a house?

**Answer:** white

**Synthetic question 2:** what type of fence is in front of a house?

**Answer:** picket

**Question:** what style of fence is this?

**Predicted answer:** picket

(d)

**Question:** what is on the ears of the cattle in this photo? **GT answer:** tag

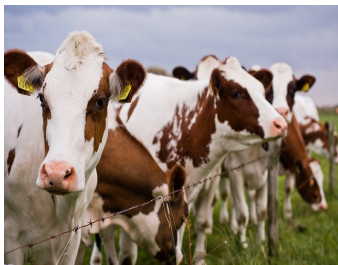

**Caption 1:** a row of cows, tied up to wires, yellow ears tags

**Caption 2:** a group of cows in grass with some yellow tags on their ears

**Caption 3:** cows with numbered ear tags standing behind a fence

**Synthetic question 1:** what are the cows wearing on their ears?

**Answer:** tags

**Synthetic question 2:** what color are the ear tags on the cows?

**Answer:** yellow

**Question:** what is on the ears of the cattle in this photo?

**Predicted answer:** tag

(e)

Figure 1. Success case analysis for OK-VQA. Green color indicates answer cues and correct prediction.

**Question:** why is timing of the essence when delivering this food item? **GT answer:** temperature/hot still/stay hot

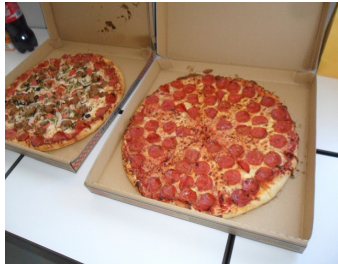

**Caption 1:** two pizza boxes have pepper pizza and take out

**Caption 2:** two boxes are opened up of two different pizzas

**Caption 3:** there are two small baked pizzas on the table

**Synthetic question 1:** what are two large pizzas sitting in?

**Answer:** boxes

**Synthetic question 2:** where are two large pizzas sitting next to each other?

**Answer:** table

**Question:** why is timing of the essence when delivering this food item?

**Predicted answer:** hot

**Question:** what era is this furniture from? **GT answer:** victorian/1940s

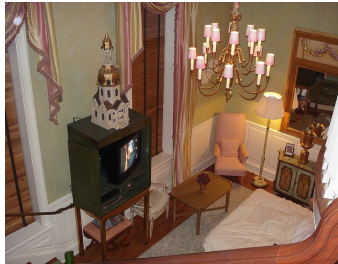

**Caption 1:** a living room with a small television in front of the window

**Caption 2:** a vintage tv is sitting on a nice table in the living room

**Caption 3:** a large house shaped model is sitting in a living room

**Synthetic question 1:** what type of room has a tv in the center?

**Answer:** living

**Synthetic question 2:** how large is the tv in the living room?

**Answer:** small

**Question:** what era is this furniture from?

**Predicted answer:** vintage

(b)

**Question:** what kind of sporting event is this? **GT answer:** soccer/not sure/pole vault

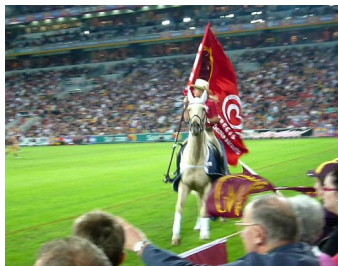

**Caption 1:** man on horse coming off from arena, holding something

**Caption 2:** a man is riding a horse during a soccer game

**Caption 3:** a man holding a red flag near a large person in a green field

**Synthetic question 1:** who is riding a horse in the middle of a stadium?

**Answer:** man

**Synthetic question 2:** what color is the flag on display at a football game?

**Answer:** red

**Question:** what kind of sporting event is this?

**Predicted answer:** football

(c)

**Question:** what type of clouds are in the picture? **GT answer:** cumulus/cumuli/nimbus

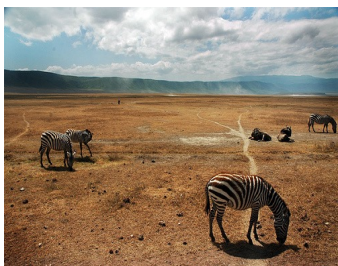

**Caption 1:** a cloudy - filled sky on a cloudy day over a zebras

**Caption 2:** the clouds are gray and full of clouds

**Caption 3:** there are many different clouds in this sky

**Synthetic question 1:** what is in the background of a photo of a zebra?

**Answer:** sky

**Synthetic question 2:** what type of sky is above on a cloudy day?

**Answer:** cloudy

**Question:** what type of clouds are in the picture?

**Predicted answer:** cloud

(d)

**Question:** how many people can this bus carry? **GT answer:** 50/40/39

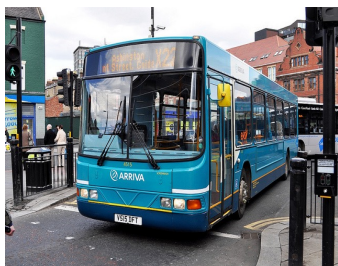

**Caption 1:** a passenger bus traveling on a street side

**Caption 2:** blue commuter bus with parked on the side of the road

**Caption 3:** a bus that says aradara rides down the street

**Synthetic question 1:** what color bus is driving down the street?

**Answer:** blue

**Synthetic question 2:** what is making it's way down the street?

**Answer:** bus

**Question:** how many people can this bus carry?

**Predicted answer:** many

(e)

Figure 2. Failure case analysis for OK-VQA. Red color indicates incorrect prediction.

432  
433  
434  
435  
436  
437  
438  
439  
440  
441  
442  
443  
444  
445  
446  
447  
448  
449  
450  
451  
452  
453  
454  
455  
456  
457  
458  
459  
460  
461  
462  
463  
464  
465  
466  
467  
468  
469  
470  
471  
472  
473  
474  
475  
476  
477  
478  
479  
480  
481  
482  
483  
484  
485

486  
487  
488  
489  
490  
491  
492  
493  
494  
495  
496  
497  
498  
499  
500  
501  
502  
503  
504  
505  
506  
507  
508  
509  
510  
511  
512  
513  
514  
515  
516  
517  
518  
519  
520  
521  
522  
523  
524  
525  
526  
527  
528  
529  
530  
531  
532  
533  
534  
535  
536  
537  
538  
539

**Question:** which food has the least carbs? **GT answer:** soup/vegetable/salad

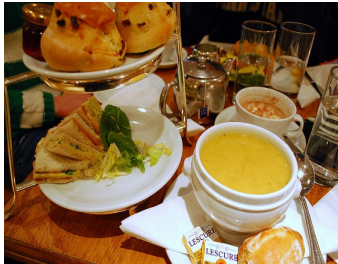

**Caption 1:** a table holding food including **soup**, sandwiches and fruit

**Caption 2:** the **soup** is very creamy in the bowl

**Caption 3:** sandwiches and **soup** is sitting on a table spread

**Synthetic question 1:** where is soup served on a table?

**Answer:** bowl

**Synthetic question 2:** what is on a plate next to a bowl of **soup**?

**Answer:** sandwich

**Question:** which food has the least carbs?

**Predicted answer:** **soup**

**Question:** in which way are the adults shown here likely related to the child? **GT answer:** parents/grandparents

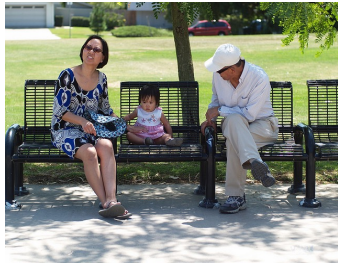

**Caption 1:** a **family** sitting down on a bench in a park

**Caption 2:** a family sitting behind a park bench talking to a **toddler**

**Caption 3:** two people sitting on benches with a **baby** next to them

**Synthetic question 1:** what is sitting on a bench?

**Answer:** a **baby**

**Synthetic question 2:** who sits next to a **toddler** on a bench?

**Answer:** **couple**

**Question:** in which way are the adults shown here likely related to the child?

**Predicted answer:** **parents**

(b)

**Question:** what other surface is this game played on? **GT answer:** grass/clay/concrete

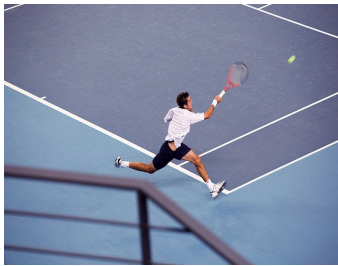

**Caption 1:** a blue surface with a **blue tennis court**

**Caption 2:** a man running across a **blue tennis court** with a racquet

**Caption 3:** a **blue tennis court** with a single game of tennis in progress

**Synthetic question 1:** what color is the **tennis court**?

**Answer:** **blue**

**Synthetic question 2:** what sport is a man playing on a **blue court**?

**Answer:** **tennis**

**Question:** what other surface is this game played on?

**Predicted answer:** **grass**

(c)

**Question:** what are they waiting to do when they stand next to the street? **GT answer:** cross/ride bus/light change

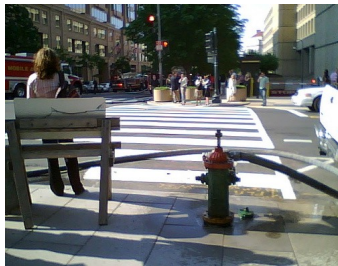

**Caption 1:** traffic and pedestrians at an **intersection** near a fire hydrant

**Caption 2:** a **sidewalk** and pedestrian **crosswalk** on a busy city street

**Caption 3:** a red fire hydrant stands besides a street that has a **crosswalk**

**Synthetic question 1:** where is a fire hydrant on a busy street?

**Answer:** **crosswalk**

**Synthetic question 2:** where are people waiting at a **crosswalk**?

**Answer:** **intersection**

**Question:** what are they waiting to do when they stand next to the street?

**Predicted answer:** **cross**

(d)

**Question:** what kind of resort are these people at? **GT answer:** ski resort/ski/snow

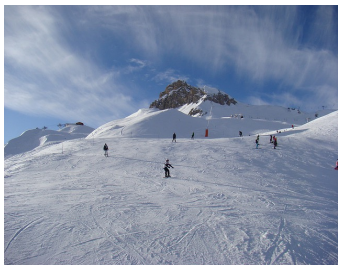

**Caption 1:** a group of people are **skiing** high up a slope

**Caption 2:** many people **skiing** down a **ski** slope during the day

**Caption 3:** a crowd of people on **skis** coming down the mountain

**Synthetic question 1:** what are people doing on a **snow** covered mountain?

**Answer:** **ski**

**Synthetic question 2:** who is **skiing** on a **snow** covered mountain?

**Answer:** people

**Question:** what kind of resort are these people at?

**Predicted answer:** **ski resort**

(e)

Figure 3. Success case analysis for A-OKVQA. Green color indicates answer cues and correct prediction.

540  
541  
542  
543  
544  
545  
546  
547  
548  
549  
550  
551  
552  
553  
554  
555  
556  
557  
558  
559  
560  
561  
562  
563  
564  
565  
566  
567  
568  
569  
570  
571  
572  
573  
574  
575  
576  
577  
578  
579  
580  
581  
582  
583  
584  
585  
586  
587  
588  
589  
590  
591  
592  
593

594  
595  
596  
597  
598  
599  
600  
601  
602  
603  
604  
605  
606  
607  
608  
609  
610  
611  
612  
613  
614  
615  
616  
617  
618  
619  
620  
621  
622  
623  
624  
625  
626  
627  
628  
629  
630  
631  
632  
633  
634  
635  
636  
637  
638  
639  
640  
641  
642  
643  
644  
645  
646  
647

**Question:** this dish is suitable for which group of people? **GT answer:** vegetarian/vegan/family

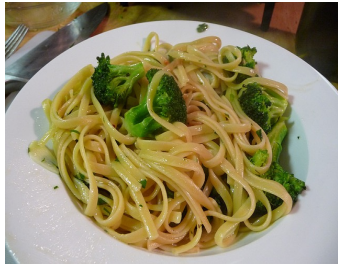

**Caption 1:** a pasta dish sitting on top of a white plate

**Caption 2:** a broccoli pasta dish that has very pasta

**Caption 3:** a dish of pasta with noodles and tomato sauce

**Synthetic question 1:** what vegetable is on a white plate?

**Answer:** broccoli

**Synthetic question 2:** what color is a plate of pasta with broccoli on it?

**Answer:** white

**Question:** this dish is suitable for which group of people?

**Predicted answer:** children

**Question:** what is in front of the monitor? **GT answer:** chair/keyboard/webcam

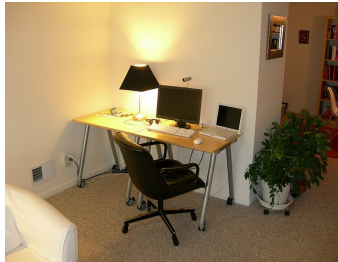

**Caption 1:** a corner table with computer computer on the desk

**Caption 2:** a computer on the small desk in a small office area

**Caption 3:** view of a computer monitor in a light lit room

**Synthetic question 1:** what is a computer sitting on in a corner of a room?

**Answer:** desk

**Synthetic question 2:** how big is the desk in the corner?

**Answer:** small

**Question:** what is in front of the monitor?

**Predicted answer:** desk

(b)

**Question:** what type of shot is the woman about to hit? **GT answer:** forehand/tennis shot/swing

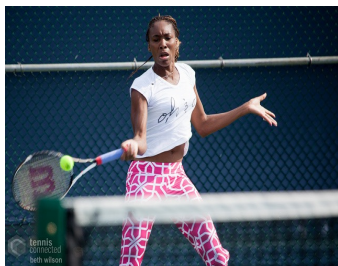

**Caption 1:** tennis player is hitting a tennis ball with her racket

**Caption 2:** a woman in pink outfit hitting a tennis ball

**Caption 3:** a woman in a cropped top and pants swinging a tennis racquet

**Synthetic question 1:** what is a tennis player doing with a tennis racket?

**Answer:** swinging

**Synthetic question 2:** who is swinging a tennis racket at a tennis ball?

**Answer:** woman

**Question:** what type of shot is the woman about to hit?

**Predicted answer:** volley

(c)

**Question:** what is in the bottles? **GT answer:** alcohol/liqueur/baileys

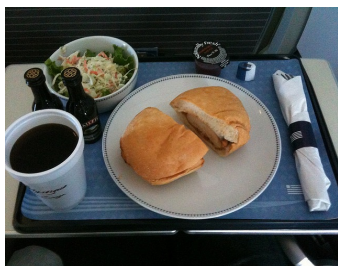

**Caption 1:** a sandwich on a plate with a glass of beer bottle

**Caption 2:** a table that has a sandwich, beer, and beer on it

**Caption 3:** a sandwich on a plate with a glass of beer bottle

**Synthetic question 1:** what is next to a sandwich and a beer?

**Answer:** bottle

**Synthetic question 2:** where is a sandwich with a beer and beer on a plate?

**Answer:** table

**Question:** what is in the bottles?

**Predicted answer:** beer

(d)

**Question:** why is the woman holding the umbrella? **GT answer:** shade/sun protection/get shadow

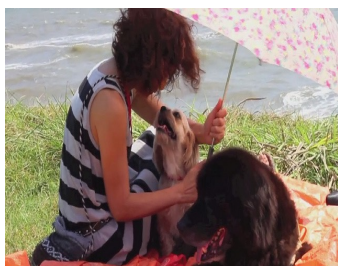

**Caption 1:** a young woman and the umbrella are on an orange blanket

**Caption 2:** a woman's umbrella and two dogs under an umbrella

**Caption 3:** a woman holding an umbrella is getting some light under her umbrella

**Synthetic question 1:** who is holding an umbrella while her dog sits under it?

**Answer:** woman

**Synthetic question 2:** what is a woman holding and a dog under it?

**Answer:** an umbrella

**Question:** why is the woman holding the umbrella?

**Predicted answer:** to protect herself from the sun

(e)

Figure 4. Failure case analysis for A-OKVQA. Red color indicates incorrect prediction.

648  
649  
650  
651  
652  
653  
654  
655  
656  
657  
658  
659  
660  
661  
662  
663  
664  
665  
666  
667  
668  
669  
670  
671  
672  
673  
674  
675  
676  
677  
678  
679  
680  
681  
682  
683  
684  
685  
686  
687  
688  
689  
690  
691  
692  
693  
694  
695  
696  
697  
698  
699  
700  
701

702  
703  
704  
705  
706  
707  
708  
709  
710  
711  
712  
713  
714  
715  
716  
717  
718  
719  
720  
721  
722  
723  
724  
725  
726  
727  
728  
729  
730  
731  
732  
733  
734  
735  
736  
737  
738  
739  
740  
741  
742  
743  
744  
745  
746  
747  
748  
749  
750  
751  
752  
753  
754  
755

**Question:** what can the ram eat in this photo? **GT answer:** grass

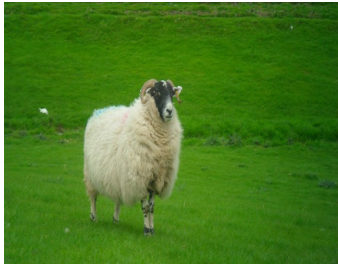

**Caption 1:** the ram is standing outside on the green grass  
**Caption 2:** a ram with white curly horns standing in a field  
**Caption 3:** shaggy coated sheep with horns facing away in the center of a grass field  
**Synthetic question 1:** where is a ram standing?  
**Answer:** grass  
**Synthetic question 2:** what animal is standing in a grassy field?  
**Answer:** sheep  
**Question:** what can the ram eat in this photo?  
**Predicted answer:** grass

**Question:** what does the sign say? **GT answer:** stop

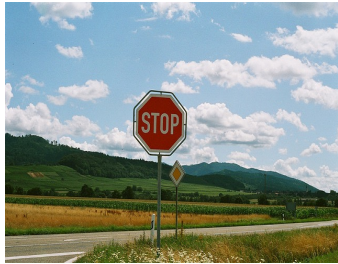

**Caption 1:** a stop sign with cloudy sky behind it  
**Caption 2:** a red stop sign with a sky background  
**Caption 3:** a tall stop sign on a rural road  
**Synthetic question 1:** what color is the stop sign?  
**Answer:** red  
**Synthetic question 2:** what type of sky is behind a stop sign?  
**Answer:** cloudy  
**Question:** what does the sign say?  
**Predicted answer:** stop

(b)

**Question:** what type animal is on the woman's pants? **GT answer:** owl/penguins

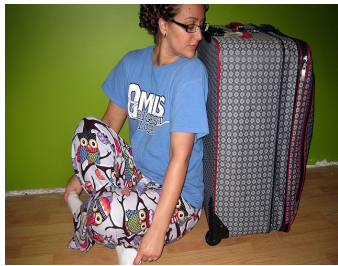

**Caption 1:** a girl is sitting on the ground in owl patterned pants  
**Caption 2:** a woman with owly print pajamas pants is sitting in front of a pile of  
**Caption 3:** a girl seated on the ground wearing pajamas  
**Synthetic question 1:** where is a young girl wearing owl pants sitting?  
**Answer:** the ground  
**Synthetic question 2:** how is a young girl wearing owl pants doing?  
**Answer:** sitting  
**Question:** what type animal is on the woman's pants?  
**Predicted answer:** owl

(c)

**Question:** how many children are at the table? **GT answer:** 3

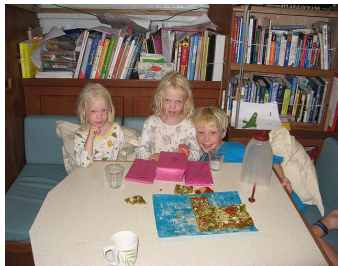

**Caption 1:** three small little kids gather together on a dining table  
**Caption 2:** a group of kids posing at a party table  
**Caption 3:** three children sitting at a table with their food smiling at a picture  
**Synthetic question 1:** what type of table are the three children sitting at?  
**Answer:** dining  
**Synthetic question 2:** how are the three children sitting at a table?  
**Answer:** smiling  
**Question:** how many children are at the table?  
**Predicted answer:** 3

(d)

**Question:** is there broccoli in this dish? **GT answer:** yes

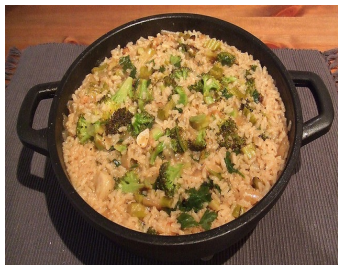

**Caption 1:** broccoli floret rice is in a large black pot  
**Caption 2:** there is a closeup of a veggie salad  
**Caption 3:** broccoli rice in a black bowl, ready to be eaten  
**Synthetic question 1:** what is covered in broccoli in a pan?  
**Answer:** rice  
**Synthetic question 2:** what is a dish filled with broccoli and other vegetables in?  
**Answer:** pot  
**Question:** is there broccoli in this dish?  
**Predicted answer:** yes

(e)

Figure 5. Success case analysis for VQAv2. Green color indicates answer cues and correct prediction.

|     |                                                                                     |                                                                                                 |                                                                                  |
|-----|-------------------------------------------------------------------------------------|-------------------------------------------------------------------------------------------------|----------------------------------------------------------------------------------|
| 756 |                                                                                     | <b>Question:</b> what is atop this building? <b>GT answer:</b> cross/stars/cross and stars      | 810                                                                              |
| 757 |    | <b>Caption 1:</b> the cathedral tower is with the clock on a steeple                            | 811                                                                              |
| 758 |                                                                                     | <b>Caption 2:</b> a clock and a two crosses on top of a church                                  | 812                                                                              |
| 759 |                                                                                     | <b>Caption 3:</b> the top of a red cathedral with a clock on the tower                          | 813                                                                              |
| 760 |                                                                                     | <b>Synthetic question 1:</b> what part of a building has a clock on it?                         | 814                                                                              |
| 761 |                                                                                     | <b>Answer:</b> top                                                                              | 815                                                                              |
| 762 |                                                                                     | <b>Synthetic question 2:</b> what color is the building with a clock on top?                    | 816                                                                              |
| 763 |                                                                                     | <b>Answer:</b> red                                                                              | 817                                                                              |
| 764 |                                                                                     | <b>Question:</b> what is atop this building?                                                    | 818                                                                              |
| 765 |                                                                                     | <b>Predicted answer:</b> a clock                                                                | 819                                                                              |
| 766 |                                                                                     |                                                                                                 | <b>Question:</b> what are they standing by? <b>GT answer:</b> bushes/tree/bricks |
| 767 |    | <b>Caption 1:</b> two girl sitting and talking, one is looking at something                     | 821                                                                              |
| 768 |                                                                                     | <b>Caption 2:</b> an older woman and young woman using cellphones                               | 822                                                                              |
| 769 |                                                                                     | <b>Caption 3:</b> two girls sitting on a brick wall during the day time                         | 823                                                                              |
| 770 |                                                                                     | <b>Synthetic question 1:</b> who are sitting on a bench looking at their phones?                | 824                                                                              |
| 771 |                                                                                     | <b>Answer:</b> women                                                                            | 825                                                                              |
| 772 |                                                                                     | <b>Synthetic question 2:</b> what type of wall are the two women sitting on?                    | 826                                                                              |
| 773 |                                                                                     | <b>Answer:</b> brick                                                                            | 827                                                                              |
| 774 |                                                                                     | <b>Question:</b> what are they standing by?                                                     | 828                                                                              |
| 775 |                                                                                     | <b>Predicted answer:</b> brick wall                                                             | 829                                                                              |
| 776 |                                                                                     |                                                                                                 | (b)                                                                              |
| 777 |                                                                                     | <b>Question:</b> how many zebras are there? <b>GT answer:</b> 3                                 | 831                                                                              |
| 778 |   | <b>Caption 1:</b> two zebras walking by a feeder full of food                                   | 832                                                                              |
| 779 |                                                                                     | <b>Caption 2:</b> pair of zebras standing together at water trough in zoo                       | 833                                                                              |
| 780 |                                                                                     | <b>Caption 3:</b> the zebras are eating out of a feeder box                                     | 834                                                                              |
| 781 |                                                                                     | <b>Synthetic question 1:</b> how many zebras are standing next to each other?                   | 835                                                                              |
| 782 |                                                                                     | <b>Answer:</b> two                                                                              | 836                                                                              |
| 783 |                                                                                     | <b>Synthetic question 2:</b> what are the zebras doing?                                         | 837                                                                              |
| 784 |                                                                                     | <b>Answer:</b> eating                                                                           | 838                                                                              |
| 785 |                                                                                     | <b>Question:</b> how many zebras are there?                                                     | 839                                                                              |
| 786 |                                                                                     | <b>Predicted answer:</b> 2                                                                      | 840                                                                              |
| 787 |                                                                                     |                                                                                                 | (c)                                                                              |
| 788 |                                                                                     | <b>Question:</b> how many buses are in the picture? <b>GT answer:</b> 8                         | 842                                                                              |
| 789 |  | <b>Caption 1:</b> a lot of buses sit parked in a line in front of a hill                        | 843                                                                              |
| 790 |                                                                                     | <b>Caption 2:</b> a group of purple passenger buses all in a row                                | 844                                                                              |
| 791 |                                                                                     | <b>Caption 3:</b> a row of purple bus buses next to each other                                  | 845                                                                              |
| 792 |                                                                                     | <b>Synthetic question 1:</b> how are the buses parked?                                          | 846                                                                              |
| 793 |                                                                                     | <b>Answer:</b> a line                                                                           | 847                                                                              |
| 794 |                                                                                     | <b>Synthetic question 2:</b> what color buses are parked in front of each other?                | 848                                                                              |
| 795 |                                                                                     | <b>Answer:</b> purple                                                                           | 849                                                                              |
| 796 |                                                                                     | <b>Question:</b> how many buses are in the picture?                                             | 850                                                                              |
| 797 |                                                                                     | <b>Predicted answer:</b> several                                                                | 851                                                                              |
| 798 |                                                                                     |                                                                                                 | (d)                                                                              |
| 799 |                                                                                     | <b>Question:</b> are the numbers on the clock Roman numerals? <b>GT answer:</b> yes             | 853                                                                              |
| 800 |  | <b>Caption 1:</b> a living room scene with a clock and tv                                       | 854                                                                              |
| 801 |                                                                                     | <b>Caption 2:</b> a chair is in front of a television that is being displayed                   | 855                                                                              |
| 802 |                                                                                     | <b>Caption 3:</b> lounge chair with a clock that is hanging on the wall, and leather chair sits | 856                                                                              |
| 803 |                                                                                     | <b>Synthetic question 1:</b> what is on in a living room?                                       | 857                                                                              |
| 804 |                                                                                     | <b>Answer:</b> television                                                                       | 858                                                                              |
| 805 |                                                                                     | <b>Synthetic question 2:</b> how is a wall clock displayed in a living room?                    | 859                                                                              |
| 806 |                                                                                     | <b>Answer:</b> hanging                                                                          | 860                                                                              |
| 807 |                                                                                     | <b>Question:</b> are the numbers on the clock Roman numerals?                                   | 861                                                                              |
| 808 |                                                                                     | <b>Predicted answer:</b> no                                                                     | 862                                                                              |
| 809 |                                                                                     |                                                                                                 | (e)                                                                              |

Figure 6. Failure case analysis for VQAv2. Red color indicates incorrect prediction.



864 **References**

- 865 [1] Yuchen Bian, Jiaji Huang, Xingyu Cai, Jiahong Yuan, and  
866 Kenneth Church. On attention redundancy: A comprehensive  
867 study. In *Proceedings of the 2021 Conference of the North*  
868 *American Chapter of the Association for Computational Lin-*  
869 *guistics: Human Language Technologies*, pages 930–945, On-  
870 line, June 2021. Association for Computational Linguistics. 1
- 871 [2] Yu Jiang, Vivek Natarajan, Xinlei Chen, Marcus Rohrbach,  
872 Dhruv Batra, and Devi Parikh. Pythia v0. 1: the winning entry  
873 to the vqa challenge 2018. *arXiv preprint arXiv:1807.09956*,  
874 2018. 2
- 875 [3] Amita Kamath, Christopher Clark, Tanmay Gupta, Eric  
876 Kolve, Derek Hoiem, and Aniruddha Kembhavi. Webly su-  
877 pervised concept expansion for general purpose vision mod-  
878 els. *arXiv preprint arXiv:2202.02317*, 2022. 2
- 879 [4] Jiasen Lu, Dhruv Batra, Devi Parikh, and Stefan Lee. ViL-  
880 BERT: Pretraining task-agnostic visiolinguistic representa-  
881 tions for vision-and-language tasks. In H. Wallach, H.  
882 Larochelle, A. Beygelzimer, F. d'Alché-Buc, E. Fox, and R.  
883 Garnett, editors, *Advances in Neural Information Processing*  
884 *Systems*, volume 32. Curran Associates, Inc., 2019. 2
- 885 [5] Kenneth Marino, Xinlei Chen, Devi Parikh, Abhinav Gupta,  
886 and Marcus Rohrbach. Krisp: Integrating implicit and sym-  
887 bolic knowledge for open-domain knowledge-based vqa. In  
888 *Proceedings of the IEEE/CVF Conference on Computer Vi-*  
889 *sion and Pattern Recognition*, pages 14111–14121, 2021. 2
- 890 [6] Dustin Schwenk, Apoorv Khandelwal, Christopher Clark,  
891 Kenneth Marino, and Roozbeh Mottaghi. A-okvqa: A bench-  
892 mark for visual question answering using world knowledge.  
893 *arXiv preprint arXiv:2206.01718*, 2022. 1
- 894 [7] Hao Tan and Mohit Bansal. LXMERT: Learning cross-  
895 modality encoder representations from transformers. In  
896 *Proceedings of the 2019 Conference on Empirical Methods*  
897 *in Natural Language Processing and the 9th International*  
898 *Joint Conference on Natural Language Processing (EMNLP-*  
899 *IJCNLP)*, pages 5100–5111, Hong Kong, China, Nov. 2019.  
900 Association for Computational Linguistics. 2

918  
919  
920  
921  
922  
923  
924  
925  
926  
927  
928  
929  
930  
931  
932  
933  
934  
935  
936  
937  
938  
939  
940  
941  
942  
943  
944  
945  
946  
947  
948  
949  
950  
951  
952  
953  
954  
955  
956  
957  
958  
959  
960  
961  
962  
963  
964  
965  
966  
967  
968  
969  
970  
971
